# Supplementary material for: Microfluidic preparation of monodisperse PLGA-PEG/PLGA microspheres with controllable morphology for drug release
Source: Royal Society of Chemistry journal article supplement (doi:10.1039/d4lc00486h), 2024-01-01
Supplement: d4lc00486h1.pdf [file d4lc00486h1.pdf]

Electronic Supplementary Material (ESI) for Lab on a Chip.

This journal is © The Royal Society of Chemistry 2024

Electronic Supplementary Information for

## Microfluidic preparation of monodisperse PLGA-PEG/PLGA microspheres with controllable morphology for drug release

Wenwen Chen,<sup>a</sup> Hao Li,<sup>a</sup> Xinyue Zhang,<sup>a</sup> Yutao Sang <sup>\*a</sup> and Zhihong Nie <sup>\*a</sup>

<sup>a</sup> State Key Laboratory of Molecular Engineering of Polymers, Department of Macromolecular Science, Fudan University, Shanghai 200438, China.

\* Corresponding Author E-mail: zhnie@fudan.edu.cn

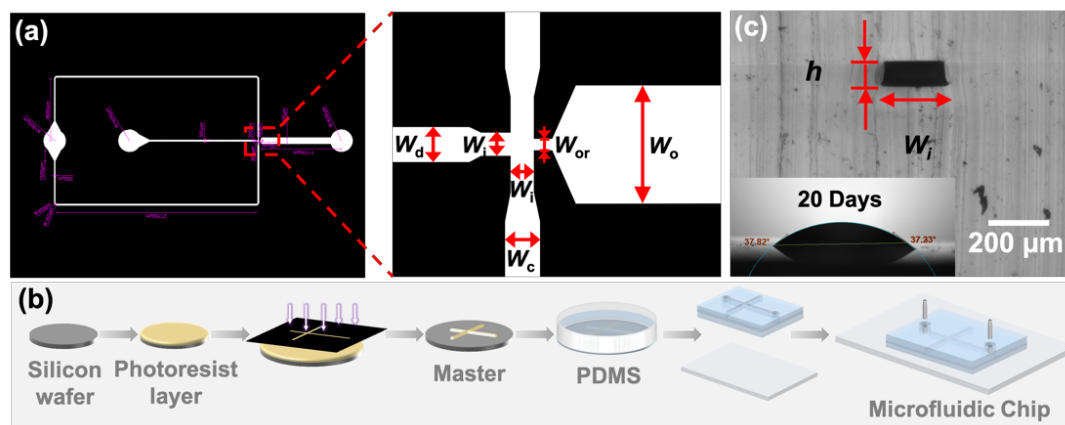

**Fig. S1.** Schematic diagram of the design (a) and fabrication (b) of microfluidic chips; photo of the chip cross-section (c) in which the inserted is the water contact of hydrophilic-treated PDMS surface.

**Tab. S1.** Geometric parameters of design and measurement of the microchannel.

|                                | $W_d$       | $W_c$       | $W_i$       | $W_{or}$    | $W_o$         | $h$         |
|--------------------------------|-------------|-------------|-------------|-------------|---------------|-------------|
| Design ( $\mu\text{m}$ )       | 300         | 300         | 200         | 100         | 1000          | -           |
| Measurement* ( $\mu\text{m}$ ) | $300 \pm 8$ | $300 \pm 7$ | $200 \pm 7$ | $100 \pm 3$ | $1000 \pm 12$ | $100 \pm 8$ |

Measurement\*: The measured geometry parameters were average at least three chip samples, observed by optical microscopy, where the height of the microchannel ( $h$ ) was measured from the chip cross-section photos, as shown in Fig. S1c.

### **Chemicals and Consumables**

Acetone, ethanol and isopropyl alcohol (IPA) were purchased from China's Sinopharm Chemical Reagent Co., Ltd.. Silicon wafers (Shunsheng Electronic Technology Co., Ltd.), SU-8 2100 and SU-8 developer (MicroChem, USA), base and curing agent of PDMS (Sylgard 184 Silicone Elastomer, Dow Corning, USA), 1*H*,1*H*,2*H*,2*H*-perfluorooctyl-trichlorosilane (FOTS, 98%, Adamas-beta), other consumables used in microfluidic platform including PTFE tubes, stainless steel needles, etc. (Suzhou Wenhao Chip Technology Co., Ltd.)

### **Fabrication of microfluidic devices**

Briefly, SU-8 photoresist was first spin-coated onto a clean and dry silicon wafer. The spin-coating condition of 500 rpm for 15 s following 2000 rpm for 50 s was determined to obtain a layer with thickness of about 100  $\mu\text{m}$ , thus a channel height of 100  $\mu\text{m}$ , as shown in the chip cross-section in Fig. S1c. Subsequently, the photoresist-coated wafer was pre-baked at 65°C for 10 mins following 95°C for 30 mins on a hotplate; exposed to UV light through a custom-made mask; baked at 95°C for 15 mins; naturally cooled, and then developed to remove the uncured SU-8, resulting in a master with the raised channel pattern. The master was plasma-treated and placed in a vacuum desiccator with PFOCT overnight to reduce its surface energy and avoid sticking during soft lithography processes.

The mixture of PDMS base and curing agent at a mass ratio of 10:1 was cast on the master and cured in a 90°C oven for 2 hrs. Once cured, a PDMS sheet with the chip pattern was cut and separated from the mold by a scalpel. Holes were drilled at the entrances and exits for tube connection. The patterned sheet was plasma-treated with a smooth and flat PDMS sheet for 30 s. Carefully aligned, pressed together, the two sheets were bond and form the closed channel. Finally, a microfluidic chip was obtained, as shown in Fig. 1b. It is worth mentioning that we optimized the method of hydrophilic modification of the PDMS channel surface to obtain long-term stable strong hydrophilicity (Fig. S1c inserted photo). The specific method is as follows: immediately after bonding, 5% (w/v) PVA/H<sub>2</sub>O was introduced into the channel. After standing at room temperature for 15 mins, the chip was placed in an oven at 90°C for 15 mins. It was used after returning to room temperature, and the channel remained filled with water.

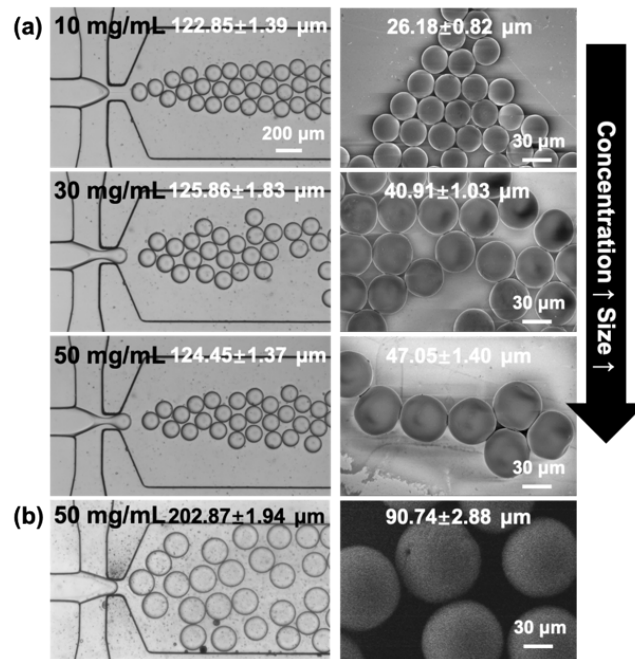

**Fig. S2.** Optical microscopy images of droplets and SEM images of microspheres (the scale bars are  $30 \mu\text{m}$ ). (a) microspheres from droplets of the same size but with different  $c_{\text{PLGA}}$ : 10 mg/mL, 30 mg/mL, 50 mg/mL, and the sizes of microspheres are  $26.18 \pm 0.82$ ,  $40.91 \pm 1.03 \mu\text{m}$ ,  $47.05 \pm 1.40 \mu\text{m}$ ; (b) microspheres from droplets of large size and high  $c_{\text{PLGA}}$ , and the size of microspheres is  $90.74 \pm 2.88 \mu\text{m}$ .

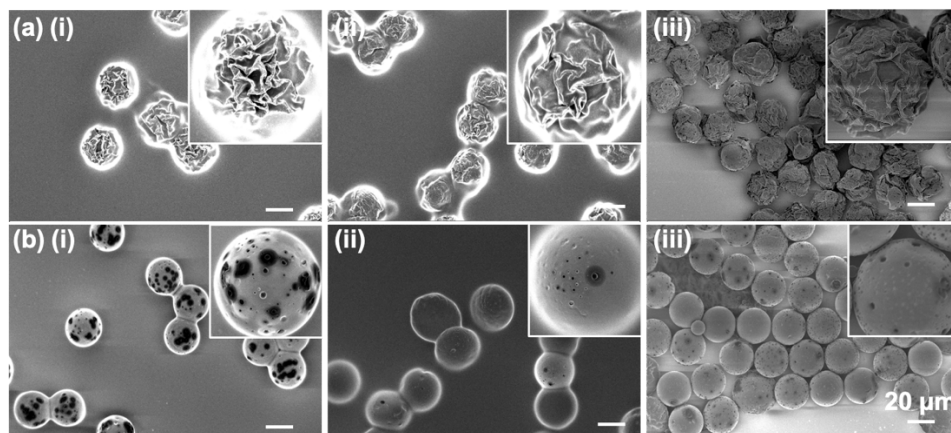

**Fig. S3.** SEM images of microspheres processed by different methods. (a) PLGA-PEG/PLGAe7576 6:4, DMC/DCM, 4% PVA; (b) PLGAe7576, DMC/DCM, 4% PVA. (i) evaporated by standing, before washing; (ii) evaporated with magnetic stirring, before washing; (iii) evaporated with stirring, after water-washing by centrifugation. The scale bars are  $20 \mu\text{m}$ .

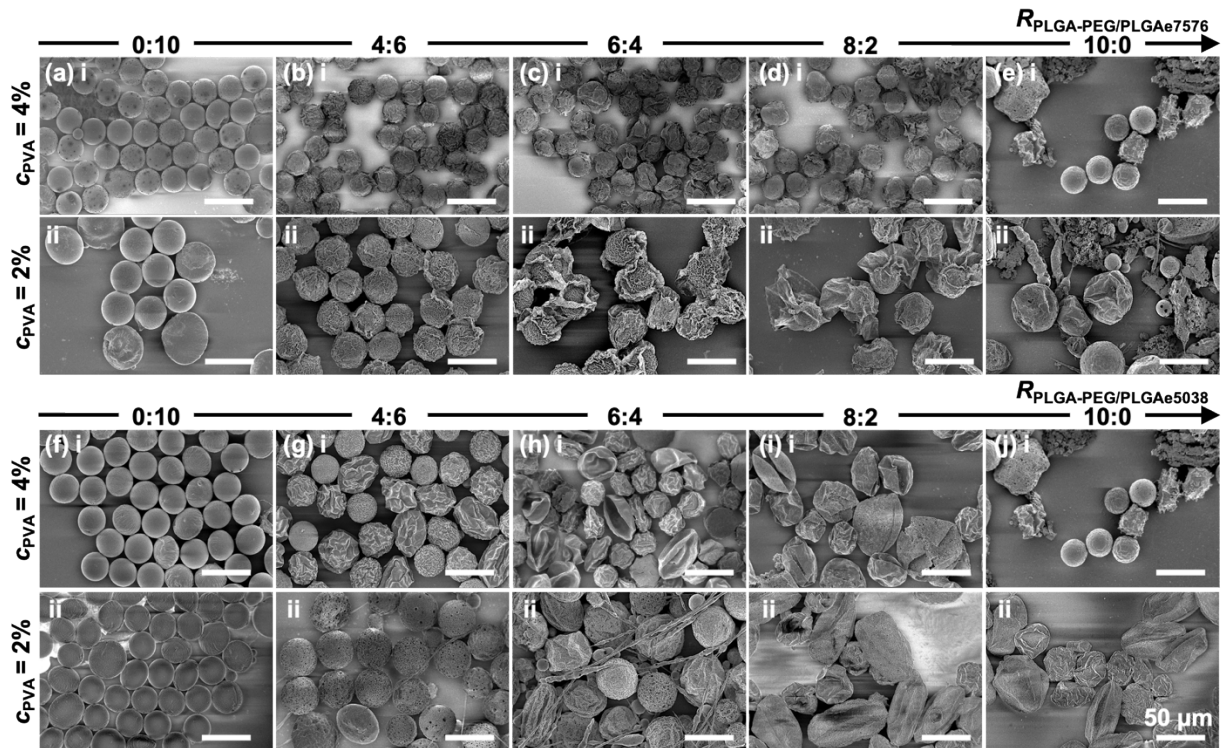

**Fig. S4.** SEM images of microspheres with different  $R_{\text{PLGA-PEG/PLGAe7576}}$  (a-e) and  $R_{\text{PLGA-PEG/PLGAe5038}}$  (f-j) in 4% PVA (i) and 2% PVA (ii). The scale bars are 50  $\mu\text{m}$ .

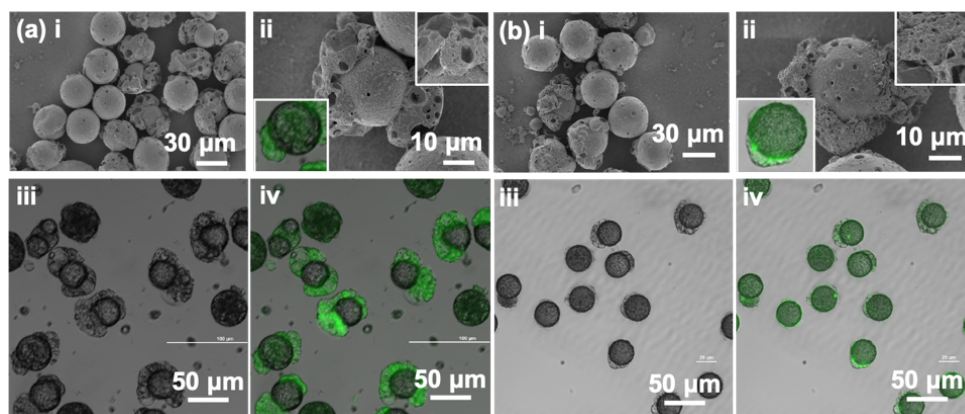

**Fig. S5.** SEM images (the scale bars in i and ii are 30  $\mu\text{m}$  and 10  $\mu\text{m}$ ) and fluorescence confocal microscopy images (iii, brightfield; iv, merged, the scale bars are 50  $\mu\text{m}$ ) of PLGA-PEG-FITC/PLGAe7576 microspheres at an  $R_{\text{PLGA-PEG/PLGAe7576}}$  of 6:4 prepared with DMC/DCM as solvent in 4% PVA (a); 2% PVA (b).

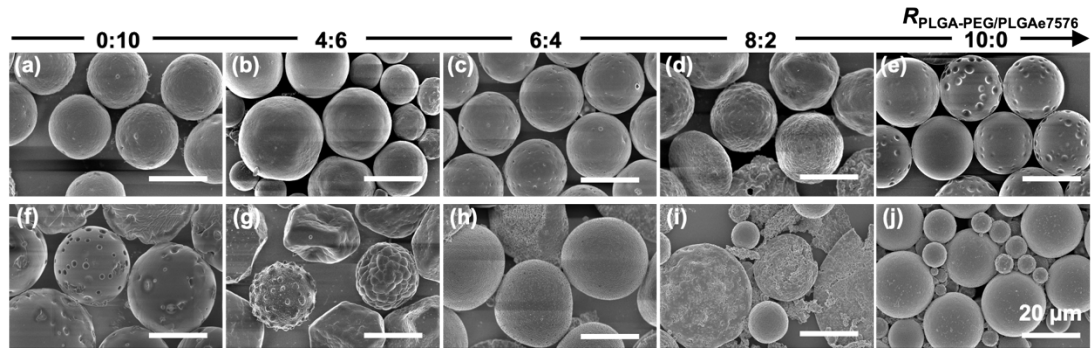

**Fig. S6.** SEM images of PLGA-PEG/PLGAe7576 microspheres with different  $R_{\text{PLGA-PEG/PLGAe7576}}$  prepared with DMC as solvent in 4% PVA (a-e) and DMC/DCM as the solvent, while the continuous phase 2% PVA saturated with DMC (f-j). The scale bars are 20  $\mu\text{m}$ .

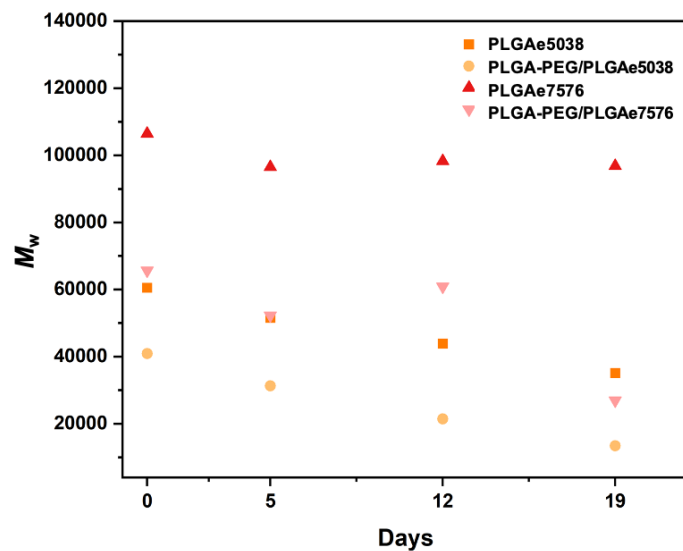

**Fig. S7.**  $M_w$  of microspheres (PLGAe5038, PLGA-PEG/PLGAe5038 at an  $R_{\text{PLGA-PEG/PLGAe5038}}$  of 4:6, PLGAe7576, PLGA-PEG/PLGAe7576 at an  $R_{\text{PLGA-PEG/PLGAe7576}}$  of 4:6) during degradation.

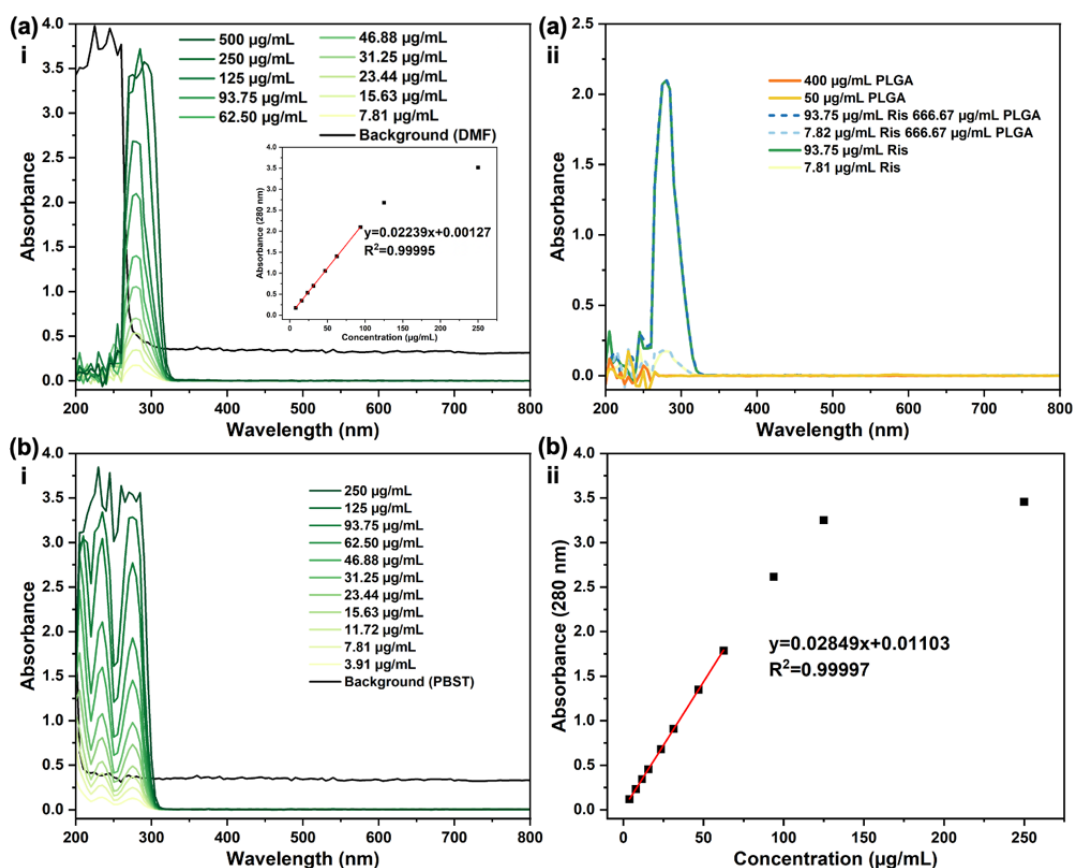

**Fig. S8.** UV absorption curves and standard curve of Ris/DMF (a) and Ris/PBST solutions (b). In addition, multiple concentrations of Ris/PLGA/DMF solutions were measured to inspect whether PLGA affected the UV absorption of risperidone ((a)ii).

**Tab. S2.** Preparation of drug-loaded microspheres.

| Formation | Polymer       | Solvent | TDL % | Continue Phase | $Q_d/Q_c$ (mL/min) | Droplet Size ( $\mu\text{m}$ ) |
|-----------|---------------|---------|-------|----------------|--------------------|--------------------------------|
| Fig. 6a   | PLGAe5038     |         |       |                | 0.005/0.020        | $73.39 \pm 1.58$               |
| Fig. 6b   | PLGAe7576     | DMC/    | 16.67 | 3% PVA         | 0.005/0.015        | $78.92 \pm 2.86$               |
| Fig. 6c   | PLGA-PEG/     | DCM     |       | 4% PVA         | 0.010/0.025        | $83.92 \pm 1.53$               |
| Fig. 6d   | PLGAe7576 6:4 |         |       | 2% PVA         | 0.008/0.033        | $86.04 \pm 2.18$               |

The yield of microspheres prepared by microfluidic approaches approximately 99%, with minimal losses occurring during subsequent treatments such as washing. The duration required to accumulate a specific mass of microspheres is mainly depends on the flow rate. For example, 10 mg of microspheres typically require 100 minutes at a dispersed phase flow rate ( $Q_d$ ) of 0.01 mL/min.

**Tab. S3.** Properties (size, DL %, and EE %) of drug-loaded microspheres.

| <b>Formation</b> | <b>Size (<math>\mu\text{m}</math>)</b> | <b>DL %</b> | <b>EE %</b> |
|------------------|----------------------------------------|-------------|-------------|
| Fig. 6a          | $25.63 \pm 0.56$                       | 0.49        | 2.96        |
| Fig. 6b          | $27.89 \pm 1.55$                       | 0.56        | 3.34        |
| Fig. 6c          | $35.80 \pm 0.86$                       | 2.69        | 16.13       |
| Fig. 6d          | $34.69 \pm 1.81$                       | 2.45        | 14.70       |
